# Supplementary material for: Gene Expression Network Analysis of Precursor Lesions in Familial Pancreatic Cancer
Source: PubMed Central journal article supplement (PMC7415888; doi:10.1089/pancan.2020.0007), 2020-08-05
Supplement: Supp_Fig1.pdf [file Supp_Fig1.pdf]

# Cluster Dendrogram

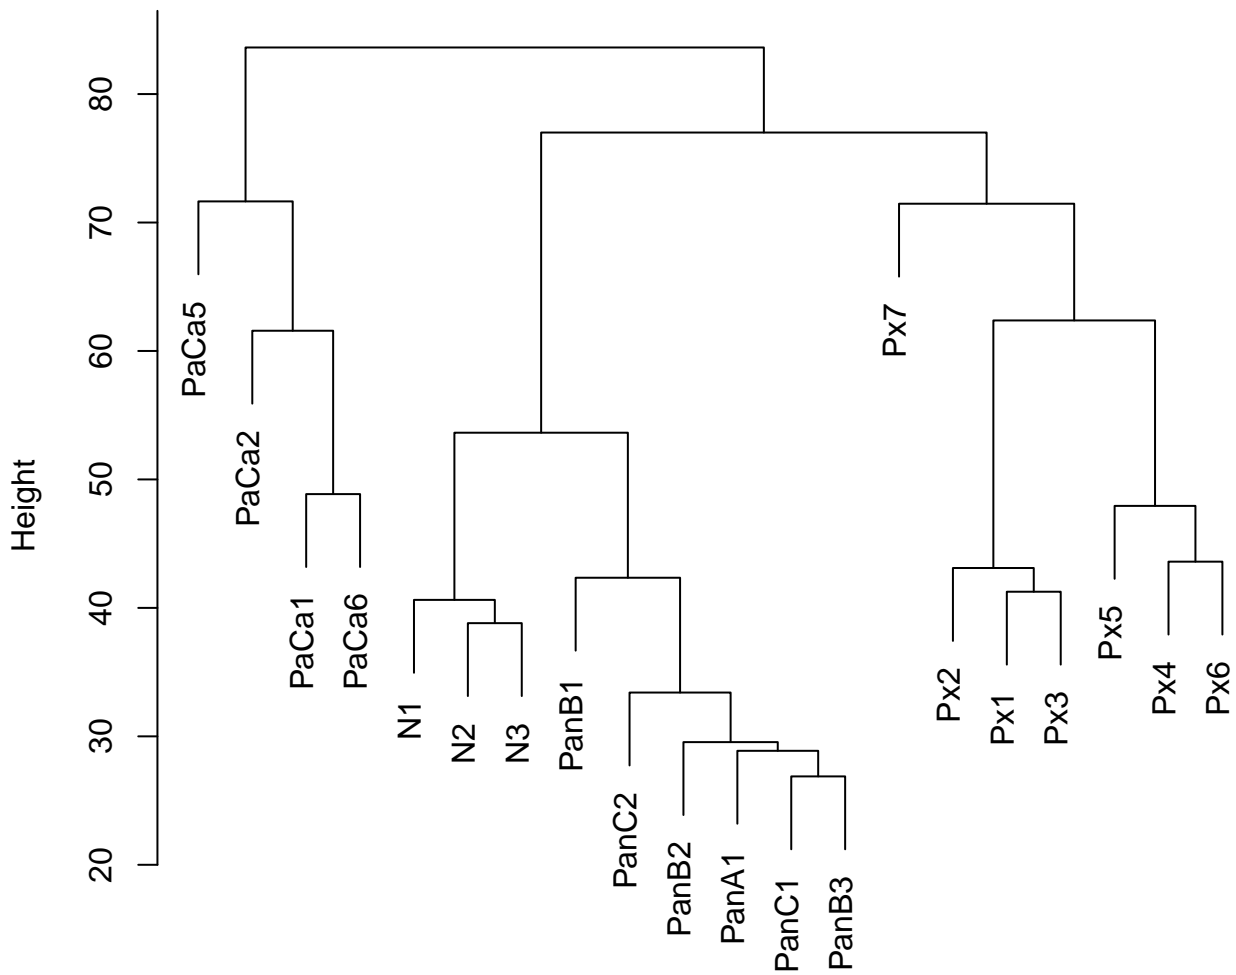

hclust (\*, "average")
