# Supplementary material for: Gene Expression Network Analysis of Precursor Lesions in Familial Pancreatic Cancer
Source: PubMed Central journal article supplement (PMC7415888; doi:10.1089/pancan.2020.0007), 2020-08-05

# Cluster Dendrogram

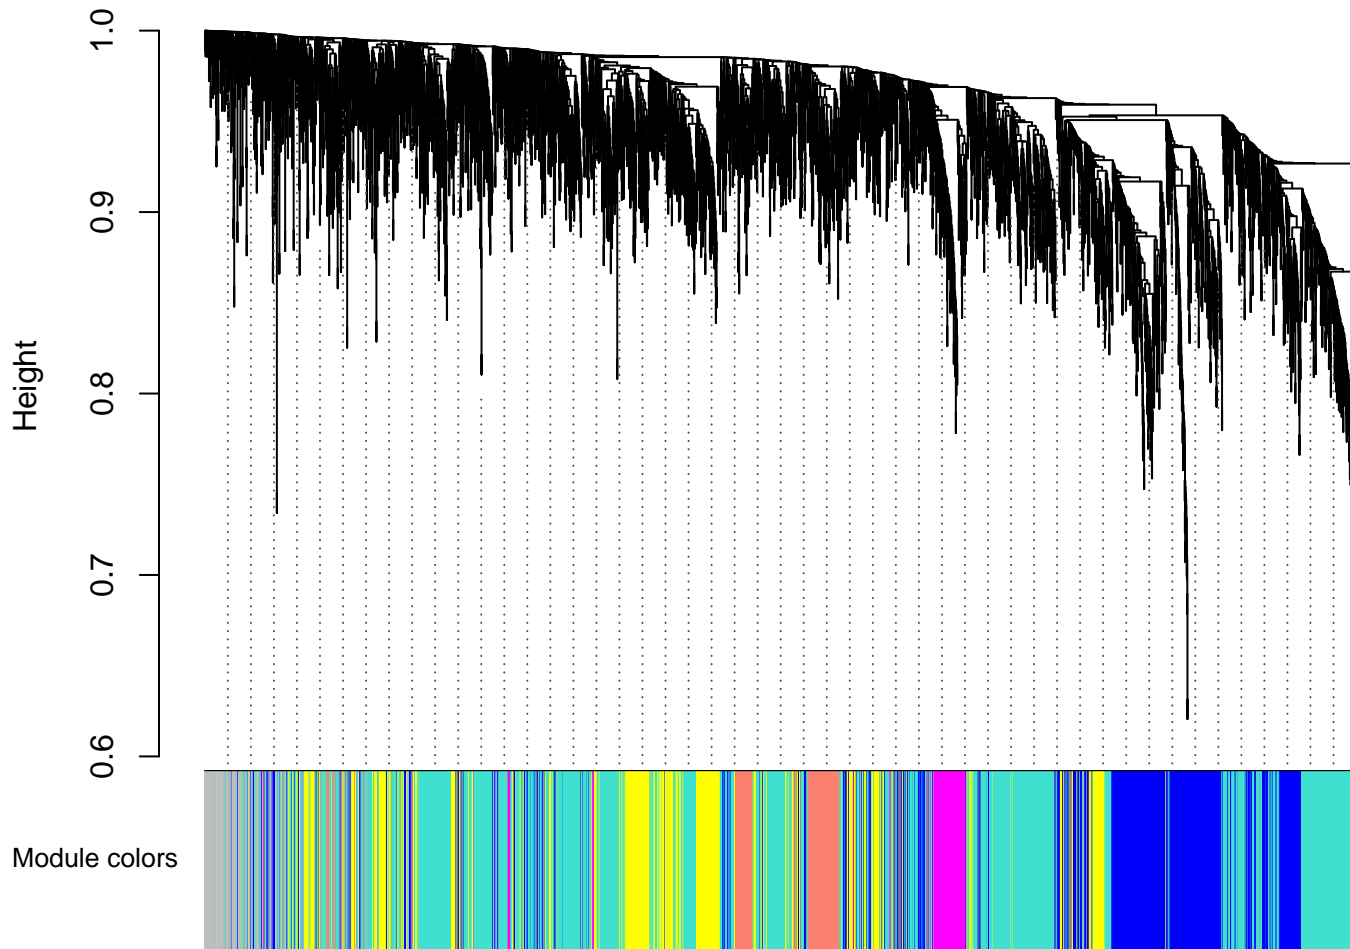

Supplement: Supp_Fig3.pdf [file Supp_Fig3.pdf]
