# Supplementary material for: Gene Expression Network Analysis of Precursor Lesions in Familial Pancreatic Cancer
Source: PubMed Central journal article supplement (PMC7415888; doi:10.1089/pancan.2020.0007), 2020-08-05
Supplement: Supp_Table1.pdf [file Supp_Table1.pdf]

| module | modSize | bkgrModSize | rank | enrichmer | Bonferoni | nModGε | bkgrTerr | termID     | termName                                                                        |
|--------|---------|-------------|------|-----------|-----------|--------|----------|------------|---------------------------------------------------------------------------------|
| black  | 599     | 511         | 1    | 4.41E-12  | 7.56E-08  | 19     | 79       | GO:0006613 | cotranslational protein targeting to membrane                                   |
| black  | 599     | 511         | 2    | 9.00E-12  | 1.54E-07  | 19     | 82       | GO:0045047 | protein targeting to ER                                                         |
| black  | 599     | 511         | 3    | 1.32E-11  | 2.26E-07  | 18     | 74       | GO:0006614 | SRP-dependent cotranslational protein targeting to membrane                     |
| black  | 599     | 511         | 4    | 2.21E-11  | 3.79E-07  | 19     | 86       | GO:0072599 | establishment of protein localization to endoplasmic reticulum                  |
| black  | 599     | 511         | 5    | 1.97E-10  | 3.37E-06  | 20     | 108      | GO:0070972 | protein localization to endoplasmic reticulum                                   |
| black  | 599     | 511         | 6    | 1.40E-09  | 2.39E-05  | 51     | 634      | GO:0043604 | amide biosynthetic process                                                      |
| black  | 599     | 511         | 7    | 1.46E-09  | 2.50E-05  | 54     | 694      | GO:0006518 | peptide metabolic process                                                       |
| black  | 599     | 511         | 8    | 1.54E-09  | 2.63E-05  | 457    | 12690    | GO:0005622 | intracellular                                                                   |
| black  | 599     | 511         | 9    | 1.97E-09  | 3.37E-05  | 21     | 135      | GO:0003735 | structural constituent of ribosome                                              |
| black  | 599     | 511         | 10   | 2.21E-09  | 3.78E-05  | 46     | 546      | GO:0006412 | translation                                                                     |
| blue   | 3472    | 3025        | 1    | 4.41E-16  | 7.56E-12  | 117    | 301      | GO:0043062 | extracellular structure organization                                            |
| blue   | 3472    | 3025        | 2    | 9.27E-16  | 1.59E-11  | 116    | 300      | GO:0030198 | extracellular matrix organization                                               |
| blue   | 3472    | 3025        | 3    | 7.77E-15  | 1.33E-10  | 136    | 382      | GO:0030055 | cell-substrate junction                                                         |
| blue   | 3472    | 3025        | 4    | 1.21E-14  | 2.07E-10  | 899    | 3865     | GO:0031982 | vesicle                                                                         |
| blue   | 3472    | 3025        | 5    | 1.71E-14  | 2.93E-10  | 133    | 374      | GO:0005925 | focal adhesion                                                                  |
| blue   | 3472    | 3025        | 6    | 3.45E-14  | 5.91E-10  | 133    | 377      | GO:0005924 | cell-substrate adherens junction                                                |
| blue   | 3472    | 3025        | 7    | 1.14E-13  | 1.95E-09  | 38     | 61       | GO:0005518 | collagen binding                                                                |
| blue   | 3472    | 3025        | 8    | 4.64E-13  | 7.95E-09  | 155    | 475      | GO:0031012 | extracellular matrix                                                            |
| blue   | 3472    | 3025        | 9    | 6.78E-13  | 1.16E-08  | 154    | 473      | GO:0005912 | adherens junction                                                               |
| blue   | 3472    | 3025        | 10   | 3.03E-12  | 5.19E-08  | 609    | 2533     | GO:1903561 | extracellular vesicle                                                           |
| brown  | 2419    | 1876        | 1    | 7.45E-05  | 1         | 102    | 600      | GO:0043547 | positive regulation of GTPase activity                                          |
| brown  | 2419    | 1876        | 2    | 0.00015   | 1         | 49     | 246      | GO:0005096 | GTPase activator activity                                                       |
| brown  | 2419    | 1876        | 3    | 0.00022   | 1         | 107    | 653      | GO:0043087 | regulation of GTPase activity                                                   |
| brown  | 2419    | 1876        | 4    | 0.00035   | 1         | 52     | 275      | GO:0030695 | GTPase regulator activity                                                       |
| brown  | 2419    | 1876        | 5    | 0.00088   | 1         | 10     | 28       | GO:0043368 | positive T cell selection                                                       |
| brown  | 2419    | 1876        | 6    | 0.00093   | 1         | 5      | 8        | GO:1903800 | positive regulation of production of miRNAs involved in gene silencing by miRNA |
| brown  | 2419    | 1876        | 7    | 0.00163   | 1         | 3      | 3        | GO:0018916 | nitrobenzene metabolic process                                                  |
| brown  | 2419    | 1876        | 8    | 0.00163   | 1         | 3      | 3        | GO:0046604 | positive regulation of mitotic centrosome separation                            |
| brown  | 2419    | 1876        | 9    | 0.00163   | 1         | 3      | 3        | GO:0051410 | detoxification of nitrogen compound                                             |
| brown  | 2419    | 1876        | 10   | 0.00163   | 1         | 3      | 3        | GO:0061205 | paramesonephric duct development                                                |
| cyan   | 201     | 166         | 1    | 2.60E-16  | 4.44E-12  | 30     | 445      | GO:0005743 | mitochondrial inner membrane                                                    |
| cyan   | 201     | 166         | 2    | 6.00E-15  | 1.03E-10  | 30     | 500      | GO:0019866 | organelle inner membrane                                                        |

|            |     |     |    |          |          |    |      |            |                                                             |
|------------|-----|-----|----|----------|----------|----|------|------------|-------------------------------------------------------------|
| cyan       | 201 | 166 | 3  | 4.51E-14 | 7.73E-10 | 33 | 662  | GO:0005740 | mitochondrial envelope                                      |
| cyan       | 201 | 166 | 4  | 5.84E-14 | 9.99E-10 | 32 | 626  | GO:0031966 | mitochondrial membrane                                      |
| cyan       | 201 | 166 | 5  | 9.23E-14 | 1.58E-09 | 20 | 215  | GO:0046034 | ATP metabolic process                                       |
| cyan       | 201 | 166 | 6  | 1.46E-13 | 2.50E-09 | 50 | 1553 | GO:0005739 | mitochondrion                                               |
| cyan       | 201 | 166 | 7  | 1.10E-12 | 1.88E-08 | 13 | 77   | GO:0042775 | mitochondrial ATP synthesis coupled electron transport      |
| cyan       | 201 | 166 | 8  | 1.17E-12 | 2.00E-08 | 14 | 96   | GO:0006119 | oxidative phosphorylation                                   |
| cyan       | 201 | 166 | 9  | 4.70E-12 | 8.04E-08 | 8  | 18   | GO:0042776 | mitochondrial ATP synthesis coupled proton transport        |
| cyan       | 201 | 166 | 10 | 6.49E-12 | 1.11E-07 | 13 | 88   | GO:1902600 | hydrogen ion transmembrane transport                        |
| darkgrey   | 79  | 74  | 1  | 0.00027  | 1        | 7  | 272  | GO:0008202 | steroid metabolic process                                   |
| darkgrey   | 79  | 74  | 2  | 0.00052  | 1        | 4  | 80   | GO:0004497 | monooxygenase activity                                      |
| darkgrey   | 79  | 74  | 3  | 0.00059  | 1        | 2  | 8    | GO:0052695 | cellular glucuronidation                                    |
| darkgrey   | 79  | 74  | 4  | 0.00127  | 1        | 3  | 46   | GO:0016836 | hydro-lyase activity                                        |
| darkgrey   | 79  | 74  | 5  | 0.00136  | 1        | 2  | 12   | GO:0031996 | thioesterase binding                                        |
| darkgrey   | 79  | 74  | 6  | 0.00143  | 1        | 31 | 4053 | GO:0005576 | extracellular region                                        |
| darkgrey   | 79  | 74  | 7  | 0.00245  | 1        | 2  | 16   | GO:0008392 | arachidonic acid epoxygenase activity                       |
| darkgrey   | 79  | 74  | 8  | 0.00262  | 1        | 8  | 515  | GO:0032787 | monocarboxylic acid metabolic process                       |
| darkgrey   | 79  | 74  | 9  | 0.00357  | 1        | 3  | 66   | GO:0019730 | antimicrobial humoral response                              |
| darkgrey   | 79  | 74  | 10 | 0.00383  | 1        | 2  | 20   | GO:0019373 | epoxygenase P450 pathway                                    |
| darkgrey   | 70  | 62  | 1  | 5.68E-05 | 0.97321  | 4  | 54   | GO:0060291 | long-term synaptic potentiation                             |
| darkgrey   | 70  | 62  | 2  | 0.00022  | 1        | 2  | 6    | GO:0033211 | adiponectin-activated signaling pathway                     |
| darkgrey   | 70  | 62  | 3  | 0.00032  | 1        | 4  | 84   | GO:0005913 | cell-cell adherens junction                                 |
| darkgrey   | 70  | 62  | 4  | 0.00035  | 1        | 15 | 1453 | GO:0007267 | cell-cell signaling                                         |
| darkgrey   | 70  | 62  | 5  | 0.00066  | 1        | 2  | 10   | GO:0070254 | mucus secretion                                             |
| darkgrey   | 70  | 62  | 6  | 0.00071  | 1        | 10 | 769  | GO:0010243 | response to organonitrogen compound                         |
| darkgrey   | 70  | 62  | 7  | 0.00077  | 1        | 4  | 106  | GO:0043200 | response to amino acid                                      |
| darkgrey   | 70  | 62  | 8  | 0.00082  | 1        | 13 | 1240 | GO:0007155 | cell adhesion                                               |
| darkgrey   | 70  | 62  | 9  | 0.00096  | 1        | 2  | 12   | GO:0006122 | mitochondrial electron transport, ubiquinol to cytochrome c |
| darkgrey   | 70  | 62  | 10 | 0.00111  | 1        | 4  | 117  | GO:0006633 | fatty acid biosynthetic process                             |
| darkorange | 39  | 28  | 1  | 0.00024  | 1        | 3  | 69   | GO:0005905 | clathrin-coated pit                                         |
| darkorange | 39  | 28  | 2  | 0.00102  | 1        | 2  | 27   | GO:0031904 | endosome lumen                                              |
| darkorange | 39  | 28  | 3  | 0.00176  | 1        | 1  | 1    | GO:0033883 | pyridoxal phosphatase activity                              |
| darkorange | 39  | 28  | 4  | 0.00176  | 1        | 1  | 1    | GO:0046570 | methylthioribulose 1-phosphate dehydratase activity         |
| darkorange | 39  | 28  | 5  | 0.00269  | 1        | 2  | 44   | GO:0036297 | interstrand cross-link repair                               |

|          |      |      |    |          |          |     |      |            |                                                                           |
|----------|------|------|----|----------|----------|-----|------|------------|---------------------------------------------------------------------------|
| darkora  | 39   | 28   | 6  | 0.00333  | 1        | 2   | 49   | GO:0004402 | histone acetyltransferase activity                                        |
| darkora  | 39   | 28   | 7  | 0.00346  | 1        | 2   | 50   | GO:0061733 | peptide-lysine-N-acetyltransferase activity                               |
| darkora  | 39   | 28   | 8  | 0.00351  | 1        | 1   | 2    | GO:0004174 | electron-transferring-flavoprotein dehydrogenase activity                 |
| darkora  | 39   | 28   | 9  | 0.00351  | 1        | 1   | 2    | GO:0042328 | heparan sulfate N-acetylglucosaminyltransferase activity                  |
| darkora  | 39   | 28   | 10 | 0.00351  | 1        | 1   | 2    | GO:0050509 | N-acetylglucosaminyl-proteoglycan 4-beta-glucuronosyltransferase activity |
| darkred  | 100  | 85   | 1  | 2.81E-05 | 0.48166  | 2   | 2    | GO:0030283 | testosterone dehydrogenase [NAD(P)] activity                              |
| darkred  | 100  | 85   | 2  | 8.41E-05 | 1        | 2   | 3    | GO:0018963 | phthalate metabolic process                                               |
| darkred  | 100  | 85   | 3  | 0.00017  | 1        | 2   | 4    | GO:0018879 | biphenyl metabolic process                                                |
| darkred  | 100  | 85   | 4  | 0.00017  | 1        | 2   | 4    | GO:0018894 | dibenzo-p-dioxin metabolic process                                        |
| darkred  | 100  | 85   | 5  | 0.00042  | 1        | 2   | 6    | GO:0061370 | testosterone biosynthetic process                                         |
| darkred  | 100  | 85   | 6  | 0.00059  | 1        | 16  | 1210 | GO:1902494 | catalytic complex                                                         |
| darkred  | 100  | 85   | 7  | 0.00072  | 1        | 4   | 76   | GO:0008080 | N-acetyltransferase activity                                              |
| darkred  | 100  | 85   | 8  | 0.00084  | 1        | 4   | 79   | GO:0000123 | histone acetyltransferase complex                                         |
| darkred  | 100  | 85   | 9  | 0.00125  | 1        | 4   | 88   | GO:0016410 | N-acyltransferase activity                                                |
| darkred  | 100  | 85   | 10 | 0.00148  | 1        | 4   | 92   | GO:0016407 | acetyltransferase activity                                                |
| darkturc | 74   | 50   | 1  | 3.09E-11 | 5.30E-07 | 5   | 9    | GO:0042571 | immunoglobulin complex, circulating                                       |
| darkturc | 74   | 50   | 2  | 1.93E-10 | 3.31E-06 | 5   | 12   | GO:0034987 | immunoglobulin receptor binding                                           |
| darkturc | 74   | 50   | 3  | 6.05E-08 | 0.00104  | 6   | 67   | GO:0003823 | antigen binding                                                           |
| darkturc | 74   | 50   | 4  | 1.32E-07 | 0.00226  | 5   | 39   | GO:0006958 | complement activation, classical pathway                                  |
| darkturc | 74   | 50   | 5  | 3.44E-07 | 0.0059   | 5   | 47   | GO:0002455 | humoral immune response mediated by circulating immunoglobulin            |
| darkturc | 74   | 50   | 6  | 4.94E-07 | 0.00846  | 4   | 21   | GO:0006910 | phagocytosis, recognition                                                 |
| darkturc | 74   | 50   | 7  | 1.19E-06 | 0.02036  | 5   | 60   | GO:0006956 | complement activation                                                     |
| darkturc | 74   | 50   | 8  | 1.73E-06 | 0.02956  | 7   | 186  | GO:0006959 | humoral immune response                                                   |
| darkturc | 74   | 50   | 9  | 5.25E-06 | 0.08993  | 4   | 37   | GO:0006911 | phagocytosis, engulfment                                                  |
| darkturc | 74   | 50   | 10 | 9.65E-06 | 0.16528  | 2   | 2    | GO:0071756 | pentameric IgM immunoglobulin complex                                     |
| green    | 1325 | 1065 | 1  | 2.61E-07 | 0.00446  | 121 | 1149 | GO:0004872 | receptor activity                                                         |
| green    | 1325 | 1065 | 2  | 6.53E-07 | 0.01118  | 25  | 125  | GO:0015276 | ligand-gated ion channel activity                                         |
| green    | 1325 | 1065 | 3  | 1.09E-06 | 0.01873  | 90  | 810  | GO:0004888 | transmembrane signaling receptor activity                                 |
| green    | 1325 | 1065 | 4  | 4.13E-06 | 0.07067  | 22  | 112  | GO:0009593 | detection of chemical stimulus                                            |
| green    | 1325 | 1065 | 5  | 6.03E-06 | 0.10331  | 18  | 82   | GO:0050907 | detection of chemical stimulus involved in sensory perception             |
| green    | 1325 | 1065 | 6  | 9.12E-06 | 0.15605  | 23  | 126  | GO:0007606 | sensory perception of chemical stimulus                                   |
| green    | 1325 | 1065 | 7  | 9.12E-06 | 0.15605  | 23  | 126  | GO:0050906 | detection of stimulus involved in sensory perception                      |
| green    | 1325 | 1065 | 8  | 1.62E-05 | 0.27801  | 94  | 914  | GO:0038023 | signaling receptor activity                                               |

|           |      |      |    |          |         |      |       |            |                                                      |
|-----------|------|------|----|----------|---------|------|-------|------------|------------------------------------------------------|
| green     | 1325 | 1065 | 9  | 2.09E-05 | 0.35699 | 37   | 268   | GO:0051606 | detection of stimulus                                |
| green     | 1325 | 1065 | 10 | 3.40E-05 | 0.58284 | 16   | 76    | GO:0030594 | neurotransmitter receptor activity                   |
| greenye   | 268  | 242  | 1  | 1.81E-05 | 0.30979 | 6    | 37    | GO:0042304 | regulation of fatty acid biosynthetic process        |
| greenye   | 268  | 242  | 2  | 2.51E-05 | 0.42943 | 50   | 1831  | GO:0008283 | cell proliferation                                   |
| greenye   | 268  | 242  | 3  | 7.38E-05 | 1       | 14   | 272   | GO:0008202 | steroid metabolic process                            |
| greenye   | 268  | 242  | 4  | 8.31E-05 | 1       | 6    | 48    | GO:0006695 | cholesterol biosynthetic process                     |
| greenye   | 268  | 242  | 5  | 8.34E-05 | 1       | 17   | 384   | GO:0005911 | cell-cell junction                                   |
| greenye   | 268  | 242  | 6  | 9.09E-05 | 1       | 7    | 70    | GO:0000786 | nucleosome                                           |
| greenye   | 268  | 242  | 7  | 9.79E-05 | 1       | 88   | 4053  | GO:0005576 | extracellular region                                 |
| greenye   | 268  | 242  | 8  | 0.00013  | 1       | 40   | 1439  | GO:0042127 | regulation of cell proliferation                     |
| greenye   | 268  | 242  | 9  | 0.00013  | 1       | 5    | 33    | GO:0019731 | antibacterial humoral response                       |
| greenye   | 268  | 242  | 10 | 0.00014  | 1       | 10   | 156   | GO:0006694 | steroid biosynthetic process                         |
| grey      | 1512 | 1214 | 1  | 0.00021  | 1       | 1014 | 12690 | GO:0005622 | intracellular                                        |
| grey      | 1512 | 1214 | 2  | 0.00031  | 1       | 31   | 211   | GO:0000075 | cell cycle checkpoint                                |
| grey      | 1512 | 1214 | 3  | 0.00033  | 1       | 7    | 19    | GO:0070987 | error-free translesion synthesis                     |
| grey      | 1512 | 1214 | 4  | 0.00034  | 1       | 53   | 430   | GO:0007067 | mitotic nuclear division                             |
| grey      | 1512 | 1214 | 5  | 0.00071  | 1       | 92   | 868   | GO:1903047 | mitotic cell cycle process                           |
| grey      | 1512 | 1214 | 6  | 0.00072  | 1       | 73   | 658   | GO:0070925 | organelle assembly                                   |
| grey      | 1512 | 1214 | 7  | 0.00074  | 1       | 99   | 948   | GO:0000278 | mitotic cell cycle                                   |
| grey      | 1512 | 1214 | 8  | 0.00079  | 1       | 20   | 121   | GO:0007062 | sister chromatid cohesion                            |
| grey      | 1512 | 1214 | 9  | 0.00084  | 1       | 759  | 9276  | GO:0044237 | cellular metabolic process                           |
| grey      | 1512 | 1214 | 10 | 0.00098  | 1       | 109  | 1070  | GO:0051276 | chromosome organization                              |
| grey60    | 169  | 155  | 1  | 3.59E-06 | 0.06142 | 3    | 4     | GO:0071953 | elastic fiber                                        |
| grey60    | 169  | 155  | 2  | 1.89E-05 | 0.32403 | 31   | 1439  | GO:0042127 | regulation of cell proliferation                     |
| grey60    | 169  | 155  | 3  | 2.95E-05 | 0.50477 | 14   | 392   | GO:0006979 | response to oxidative stress                         |
| grey60    | 169  | 155  | 4  | 0.0001   | 1       | 3    | 10    | GO:0070102 | interleukin-6-mediated signaling pathway             |
| grey60    | 169  | 155  | 5  | 0.00011  | 1       | 4    | 26    | GO:0071354 | cellular response to interleukin-6                   |
| grey60    | 169  | 155  | 6  | 0.00014  | 1       | 34   | 1831  | GO:0008283 | cell proliferation                                   |
| grey60    | 169  | 155  | 7  | 0.00019  | 1       | 3    | 12    | GO:0006264 | mitochondrial DNA replication                        |
| grey60    | 169  | 155  | 8  | 0.00019  | 1       | 4    | 30    | GO:0070741 | response to interleukin-6                            |
| grey60    | 169  | 155  | 9  | 0.00025  | 1       | 4    | 32    | GO:0044091 | membrane biogenesis                                  |
| grey60    | 169  | 155  | 10 | 0.00028  | 1       | 2    | 3     | GO:0090298 | negative regulation of mitochondrial DNA replication |
| lightcyan | 172  | 125  | 1  | 2.37E-05 | 0.40545 | 4    | 22    | GO:0048679 | regulation of axon regeneration                      |

|             |     |     |    |          |          |     |      |            |                                                       |
|-------------|-----|-----|----|----------|----------|-----|------|------------|-------------------------------------------------------|
| lightcyan   | 172 | 125 | 2  | 4.02E-05 | 0.68849  | 4   | 25   | GO:0070570 | regulation of neuron projection regeneration          |
| lightcyan   | 172 | 125 | 3  | 9.85E-05 | 1        | 3   | 12   | GO:0048681 | negative regulation of axon regeneration              |
| lightcyan   | 172 | 125 | 4  | 0.00013  | 1        | 3   | 13   | GO:0070571 | negative regulation of neuron projection regeneration |
| lightcyan   | 172 | 125 | 5  | 0.00027  | 1        | 4   | 40   | GO:0031103 | axon regeneration                                     |
| lightcyan   | 172 | 125 | 6  | 0.00032  | 1        | 5   | 76   | GO:0007098 | centrosome cycle                                      |
| lightcyan   | 172 | 125 | 7  | 0.00054  | 1        | 4   | 48   | GO:0031102 | neuron projection regeneration                        |
| lightcyan   | 172 | 125 | 8  | 0.0009   | 1        | 2   | 6    | GO:0002318 | myeloid progenitor cell differentiation               |
| lightcyan   | 172 | 125 | 9  | 0.00125  | 1        | 2   | 7    | GO:0035374 | chondroitin sulfate binding                           |
| lightcyan   | 172 | 125 | 10 | 0.00133  | 1        | 4   | 61   | GO:0048678 | response to axon injury                               |
| lightgreen  | 168 | 150 | 1  | 8.20E-06 | 0.14047  | 11  | 222  | GO:0060485 | mesenchyme development                                |
| lightgreen  | 168 | 150 | 2  | 1.60E-05 | 0.2744   | 3   | 6    | GO:0019237 | centromeric DNA binding                               |
| lightgreen  | 168 | 150 | 3  | 0.0007   | 1        | 5   | 75   | GO:0061333 | renal tubule morphogenesis                            |
| lightgreen  | 168 | 150 | 4  | 0.00098  | 1        | 4   | 47   | GO:0009948 | anterior/posterior axis specification                 |
| lightgreen  | 168 | 150 | 5  | 0.00124  | 1        | 4   | 50   | GO:0005876 | spindle microtubule                                   |
| lightgreen  | 168 | 150 | 6  | 0.00176  | 1        | 5   | 92   | GO:0061326 | renal tubule development                              |
| lightgreen  | 168 | 150 | 7  | 0.00179  | 1        | 2   | 7    | GO:0014866 | skeletal myofibril assembly                           |
| lightgreen  | 168 | 150 | 8  | 0.00179  | 1        | 2   | 7    | GO:0003696 | satellite DNA binding                                 |
| lightgreen  | 168 | 150 | 9  | 0.00213  | 1        | 5   | 96   | GO:0001657 | ureteric bud development                              |
| lightgreen  | 168 | 150 | 10 | 0.00213  | 1        | 5   | 96   | GO:0072163 | mesonephric epithelium development                    |
| lightyellow | 133 | 104 | 1  | 0.00025  | 1        | 2   | 4    | GO:0061304 | retinal blood vessel morphogenesis                    |
| lightyellow | 133 | 104 | 2  | 0.00042  | 1        | 2   | 5    | GO:0035426 | extracellular matrix-cell signaling                   |
| lightyellow | 133 | 104 | 3  | 0.00147  | 1        | 2   | 9    | GO:0061299 | retina vasculature morphogenesis in camera-type eye   |
| lightyellow | 133 | 104 | 4  | 0.00184  | 1        | 2   | 10   | GO:0031987 | locomotion involved in locomotory behavior            |
| lightyellow | 133 | 104 | 5  | 0.00223  | 1        | 2   | 11   | GO:0005513 | detection of calcium ion                              |
| lightyellow | 133 | 104 | 6  | 0.00267  | 1        | 2   | 12   | GO:0019215 | intermediate filament binding                         |
| lightyellow | 133 | 104 | 7  | 0.00365  | 1        | 2   | 14   | GO:0042813 | Wnt-activated receptor activity                       |
| lightyellow | 133 | 104 | 8  | 0.0041   | 1        | 9   | 479  | GO:0007423 | sensory organ development                             |
| lightyellow | 133 | 104 | 9  | 0.00419  | 1        | 2   | 15   | GO:0001673 | male germ cell nucleus                                |
| lightyellow | 133 | 104 | 10 | 0.00477  | 1        | 2   | 16   | GO:0061298 | retina vasculature development in camera-type eye     |
| magenta     | 530 | 478 | 1  | 1.86E-15 | 3.19E-11 | 144 | 2533 | GO:1903561 | extracellular vesicle                                 |
| magenta     | 530 | 478 | 2  | 6.74E-15 | 1.15E-10 | 142 | 2520 | GO:0070062 | extracellular exosome                                 |
| magenta     | 530 | 478 | 3  | 1.89E-13 | 3.24E-09 | 187 | 3865 | GO:0031982 | vesicle                                               |
| magenta     | 530 | 478 | 4  | 1.55E-08 | 0.00027  | 169 | 3846 | GO:0012505 | endomembrane system                                   |

|          |     |     |    |          |         |     |      |            |                                                                                  |
|----------|-----|-----|----|----------|---------|-----|------|------------|----------------------------------------------------------------------------------|
| magenta  | 530 | 478 | 5  | 1.39E-07 | 0.00238 | 172 | 4053 | GO:0005576 | extracellular region                                                             |
| magenta  | 530 | 478 | 6  | 1.93E-07 | 0.00331 | 32  | 384  | GO:0005911 | cell-cell junction                                                               |
| magenta  | 530 | 478 | 7  | 1.43E-06 | 0.02445 | 283 | 7739 | GO:0016020 | membrane                                                                         |
| magenta  | 530 | 478 | 8  | 4.10E-06 | 0.07012 | 73  | 1428 | GO:0046903 | secretion                                                                        |
| magenta  | 530 | 478 | 9  | 4.65E-06 | 0.07969 | 7   | 24   | GO:0032528 | microvillus organization                                                         |
| magenta  | 530 | 478 | 10 | 6.70E-06 | 0.11473 | 31  | 431  | GO:0050839 | cell adhesion molecule binding                                                   |
| midnight | 181 | 122 | 1  | 0.00017  | 1       | 2   | 3    | GO:0005157 | macrophage colony-stimulating factor receptor binding                            |
| midnight | 181 | 122 | 2  | 0.00429  | 1       | 2   | 13   | GO:0001741 | XY body                                                                          |
| midnight | 181 | 122 | 3  | 0.00734  | 1       | 2   | 17   | GO:0007026 | negative regulation of microtubule depolymerization                              |
| midnight | 181 | 122 | 4  | 0.00734  | 1       | 2   | 17   | GO:0009264 | deoxyribonucleotide catabolic process                                            |
| midnight | 181 | 122 | 5  | 0.00766  | 1       | 1   | 1    | GO:0016077 | snoRNA catabolic process                                                         |
| midnight | 181 | 122 | 6  | 0.00766  | 1       | 1   | 1    | GO:0033499 | galactose catabolic process via UDP-galactose                                    |
| midnight | 181 | 122 | 7  | 0.00766  | 1       | 1   | 1    | GO:0035863 | dITP catabolic process                                                           |
| midnight | 181 | 122 | 8  | 0.00766  | 1       | 1   | 1    | GO:0055113 | epiboly involved in gastrulation with mouth forming second                       |
| midnight | 181 | 122 | 9  | 0.00766  | 1       | 1   | 1    | GO:0070143 | mitochondrial alanyl-tRNA aminoacylation                                         |
| midnight | 181 | 122 | 10 | 0.00766  | 1       | 1   | 1    | GO:1901639 | XDP catabolic process                                                            |
| orange   | 41  | 33  | 1  | 0.00085  | 1       | 2   | 21   | GO:0046697 | decidualization                                                                  |
| orange   | 41  | 33  | 2  | 0.00199  | 1       | 2   | 32   | GO:0001893 | maternal placenta development                                                    |
| orange   | 41  | 33  | 3  | 0.00207  | 1       | 1   | 1    | GO:0048685 | negative regulation of collateral sprouting of intact axon in response to injury |
| orange   | 41  | 33  | 4  | 0.00207  | 1       | 1   | 1    | GO:1902773 | GTPase activator complex                                                         |
| orange   | 41  | 33  | 5  | 0.00207  | 1       | 1   | 1    | GO:0001631 | cysteinyl leukotriene receptor activity                                          |
| orange   | 41  | 33  | 6  | 0.00207  | 1       | 1   | 1    | GO:0004051 | arachidonate 5-lipoxygenase activity                                             |
| orange   | 41  | 33  | 7  | 0.00207  | 1       | 1   | 1    | GO:0031682 | G-protein gamma-subunit binding                                                  |
| orange   | 41  | 33  | 8  | 0.00207  | 1       | 1   | 1    | GO:0047395 | glycerophosphoinositol glycerophosphodiesterase activity                         |
| orange   | 41  | 33  | 9  | 0.00294  | 1       | 2   | 39   | GO:0043551 | regulation of phosphatidylinositol 3-kinase activity                             |
| orange   | 41  | 33  | 10 | 0.0034   | 1       | 2   | 42   | GO:0007566 | embryo implantation                                                              |
| pink     | 534 | 366 | 1  | 0.00053  | 1       | 2   | 2    | GO:0036228 | protein targeting to nuclear inner membrane                                      |
| pink     | 534 | 366 | 2  | 0.00156  | 1       | 2   | 3    | GO:0033693 | neurofilament bundle assembly                                                    |
| pink     | 534 | 366 | 3  | 0.00156  | 1       | 2   | 3    | GO:0016035 | zeta DNA polymerase complex                                                      |
| pink     | 534 | 366 | 4  | 0.00173  | 1       | 3   | 11   | GO:0000800 | lateral element                                                                  |
| pink     | 534 | 366 | 5  | 0.00258  | 1       | 7   | 81   | GO:0000794 | condensed nuclear chromosome                                                     |
| pink     | 534 | 366 | 6  | 0.0029   | 1       | 3   | 13   | GO:0003906 | DNA-(apurinic or apyrimidinic site) lyase activity                               |
| pink     | 534 | 366 | 7  | 0.00306  | 1       | 2   | 4    | GO:1902953 | positive regulation of ER to Golgi vesicle-mediated transport                    |

|          |     |     |    |          |         |     |      |            |                                                                                                  |
|----------|-----|-----|----|----------|---------|-----|------|------------|--------------------------------------------------------------------------------------------------|
| pink     | 534 | 366 | 8  | 0.00363  | 1       | 3   | 14   | GO:0055106 | ubiquitin-protein transferase regulator activity                                                 |
| pink     | 534 | 366 | 9  | 0.00503  | 1       | 2   | 5    | GO:0097418 | neurofibrillary tangle                                                                           |
| pink     | 534 | 366 | 10 | 0.00663  | 1       | 4   | 33   | GO:0043928 | exonucleolytic nuclear-transcribed mRNA catabolic process in deadenylation-dependent decay       |
| purple   | 356 | 314 | 1  | 1.19E-06 | 0.02039 | 33  | 668  | GO:0009986 | cell surface                                                                                     |
| purple   | 356 | 314 | 2  | 1.30E-06 | 0.02231 | 42  | 971  | GO:0048878 | chemical homeostasis                                                                             |
| purple   | 356 | 314 | 3  | 3.96E-06 | 0.06779 | 8   | 48   | GO:0033762 | response to glucagon                                                                             |
| purple   | 356 | 314 | 4  | 8.59E-06 | 0.14713 | 36  | 835  | GO:0033993 | response to lipid                                                                                |
| purple   | 356 | 314 | 5  | 2.23E-05 | 0.38115 | 180 | 7293 | GO:0050896 | response to stimulus                                                                             |
| purple   | 356 | 314 | 6  | 2.40E-05 | 0.41041 | 118 | 4304 | GO:0005886 | plasma membrane                                                                                  |
| purple   | 356 | 314 | 7  | 3.15E-05 | 0.53883 | 112 | 4053 | GO:0005576 | extracellular region                                                                             |
| purple   | 356 | 314 | 8  | 3.20E-05 | 0.54795 | 15  | 220  | GO:0019932 | second-messenger-mediated signaling                                                              |
| purple   | 356 | 314 | 9  | 4.85E-05 | 0.83075 | 45  | 1240 | GO:0007155 | cell adhesion                                                                                    |
| purple   | 356 | 314 | 10 | 4.91E-05 | 0.84023 | 52  | 1512 | GO:0042592 | homeostatic process                                                                              |
| red      | 779 | 649 | 1  | 7.85E-05 | 1       | 7   | 27   | GO:0007099 | centriole replication                                                                            |
| red      | 779 | 649 | 2  | 0.00013  | 1       | 7   | 29   | GO:0098534 | centriole assembly                                                                               |
| red      | 779 | 649 | 3  | 0.00033  | 1       | 5   | 16   | GO:0008392 | arachidonic acid epoxygenase activity                                                            |
| red      | 779 | 649 | 4  | 0.00034  | 1       | 11  | 79   | GO:0000123 | histone acetyltransferase complex                                                                |
| red      | 779 | 649 | 5  | 0.00059  | 1       | 9   | 59   | GO:0051298 | centrosome duplication                                                                           |
| red      | 779 | 649 | 6  | 0.00063  | 1       | 3   | 5    | GO:0061743 | motor learning                                                                                   |
| red      | 779 | 649 | 7  | 0.00099  | 1       | 10  | 76   | GO:0007098 | centrosome cycle                                                                                 |
| red      | 779 | 649 | 8  | 0.00103  | 1       | 5   | 20   | GO:0019373 | epoxygenase P450 pathway                                                                         |
| red      | 779 | 649 | 9  | 0.00123  | 1       | 3   | 6    | GO:1990316 | ATG1/ULK1 kinase complex                                                                         |
| red      | 779 | 649 | 10 | 0.00123  | 1       | 3   | 6    | GO:0003836 | beta-galactoside (CMP) alpha-2,3-sialyltransferase activity                                      |
| royalblu | 129 | 75  | 1  | 0.00077  | 1       | 2   | 9    | GO:0018095 | protein polyglutamylolation                                                                      |
| royalblu | 129 | 75  | 2  | 0.00123  | 1       | 3   | 45   | GO:0032648 | regulation of interferon-beta production                                                         |
| royalblu | 129 | 75  | 3  | 0.0014   | 1       | 2   | 12   | GO:0007342 | fusion of sperm to egg plasma membrane                                                           |
| royalblu | 129 | 75  | 4  | 0.0014   | 1       | 2   | 12   | GO:0032688 | negative regulation of interferon-beta production                                                |
| royalblu | 129 | 75  | 5  | 0.0014   | 1       | 3   | 47   | GO:0032608 | interferon-beta production                                                                       |
| royalblu | 129 | 75  | 6  | 0.00218  | 1       | 4   | 116  | GO:0032479 | regulation of type I interferon production                                                       |
| royalblu | 129 | 75  | 7  | 0.00225  | 1       | 4   | 117  | GO:0032606 | type I interferon production                                                                     |
| royalblu | 129 | 75  | 8  | 0.00471  | 1       | 1   | 1    | GO:0021813 | cell-cell adhesion in neuronal-glia interactions in cerebral cortex radial glia guided migration |
| royalblu | 129 | 75  | 9  | 0.00471  | 1       | 1   | 1    | GO:0005503 | all-trans retinal binding                                                                        |
| royalblu | 129 | 75  | 10 | 0.00471  | 1       | 1   | 1    | GO:0015196 | L-tryptophan transmembrane transporter activity                                                  |

|           |      |      |    |          |         |     |      |            |                                                                                             |
|-----------|------|------|----|----------|---------|-----|------|------------|---------------------------------------------------------------------------------------------|
| salmon    | 255  | 186  | 1  | 0.00014  | 1       | 2   | 2    | GO:0004458 | D-lactate dehydrogenase (cytochrome) activity                                               |
| salmon    | 255  | 186  | 2  | 0.00021  | 1       | 64  | 3641 | GO:0046872 | metal ion binding                                                                           |
| salmon    | 255  | 186  | 3  | 0.00036  | 1       | 16  | 515  | GO:0016569 | covalent chromatin modification                                                             |
| salmon    | 255  | 186  | 4  | 0.00038  | 1       | 64  | 3719 | GO:0043169 | cation binding                                                                              |
| salmon    | 255  | 186  | 5  | 0.00039  | 1       | 14  | 416  | GO:0016570 | histone modification                                                                        |
| salmon    | 255  | 186  | 6  | 0.0004   | 1       | 2   | 3    | GO:0071001 | U4/U6 snRNP                                                                                 |
| salmon    | 255  | 186  | 7  | 0.00063  | 1       | 4   | 34   | GO:0017069 | snRNA binding                                                                               |
| salmon    | 255  | 186  | 8  | 0.00064  | 1       | 3   | 15   | GO:0070816 | phosphorylation of RNA polymerase II C-terminal domain                                      |
| salmon    | 255  | 186  | 9  | 0.00132  | 1       | 3   | 19   | GO:0071425 | hematopoietic stem cell proliferation                                                       |
| salmon    | 255  | 186  | 10 | 0.00132  | 1       | 2   | 5    | GO:0019323 | pentose catabolic process                                                                   |
| tan       | 261  | 198  | 1  | 1.89E-06 | 0.03238 | 3   | 3    | GO:0001156 | TFIIIC-class transcription factor binding                                                   |
| tan       | 261  | 198  | 2  | 1.86E-05 | 0.31786 | 3   | 5    | GO:0001025 | RNA polymerase III transcription factor binding                                             |
| tan       | 261  | 198  | 3  | 0.00091  | 1       | 2   | 4    | GO:0001032 | RNA polymerase III type 3 promoter DNA binding                                              |
| tan       | 261  | 198  | 4  | 0.0015   | 1       | 2   | 5    | GO:0001030 | RNA polymerase III type 1 promoter DNA binding                                              |
| tan       | 261  | 198  | 5  | 0.0015   | 1       | 2   | 5    | GO:0001031 | RNA polymerase III type 2 promoter DNA binding                                              |
| tan       | 261  | 198  | 6  | 0.0031   | 1       | 2   | 7    | GO:0071233 | cellular response to leucine                                                                |
| tan       | 261  | 198  | 7  | 0.0031   | 1       | 2   | 7    | GO:0031931 | TORC1 complex                                                                               |
| tan       | 261  | 198  | 8  | 0.0031   | 1       | 2   | 7    | GO:0070652 | HAUS complex                                                                                |
| tan       | 261  | 198  | 9  | 0.0031   | 1       | 2   | 7    | GO:0001016 | RNA polymerase III regulatory region DNA binding                                            |
| tan       | 261  | 198  | 10 | 0.0031   | 1       | 2   | 7    | GO:0008467 | [heparan sulfate]-glucosamine 3-sulfotransferase 1 activity                                 |
| turquoise | 3906 | 3148 | 1  | 1.49E-06 | 0.02558 | 151 | 538  | GO:0048812 | neuron projection morphogenesis                                                             |
| turquoise | 3906 | 3148 | 2  | 1.59E-06 | 0.02722 | 140 | 492  | GO:0048667 | cell morphogenesis involved in neuron differentiation                                       |
| turquoise | 3906 | 3148 | 3  | 1.93E-06 | 0.03308 | 154 | 553  | GO:0048858 | cell projection morphogenesis                                                               |
| turquoise | 3906 | 3148 | 4  | 3.20E-06 | 0.0548  | 288 | 1150 | GO:0030182 | neuron differentiation                                                                      |
| turquoise | 3906 | 3148 | 5  | 6.05E-06 | 0.10358 | 156 | 572  | GO:0032990 | cell part morphogenesis                                                                     |
| turquoise | 3906 | 3148 | 6  | 8.83E-06 | 0.15118 | 478 | 2045 | GO:0007399 | nervous system development                                                                  |
| turquoise | 3906 | 3148 | 7  | 9.01E-06 | 0.1543  | 115 | 401  | GO:0007409 | axonogenesis                                                                                |
| turquoise | 3906 | 3148 | 8  | 1.92E-05 | 0.32875 | 231 | 916  | GO:0048666 | neuron development                                                                          |
| turquoise | 3906 | 3148 | 9  | 3.78E-05 | 0.64645 | 83  | 279  | GO:0005261 | cation channel activity                                                                     |
| turquoise | 3906 | 3148 | 10 | 6.14E-05 | 1       | 213 | 850  | GO:0000902 | cell morphogenesis                                                                          |
| yellow    | 1731 | 1430 | 1  | 3.85E-08 | 0.00066 | 34  | 138  | GO:0052652 | cyclic purine nucleotide metabolic process                                                  |
| yellow    | 1731 | 1430 | 2  | 4.66E-08 | 0.0008  | 34  | 139  | GO:0009190 | cyclic nucleotide biosynthetic process                                                      |
| yellow    | 1731 | 1430 | 3  | 3.00E-07 | 0.00513 | 36  | 163  | GO:0007187 | G-protein coupled receptor signaling pathway, coupled to cyclic nucleotide second messenger |



|        |      |      |    |          |         |     |     |            |                                              |
|--------|------|------|----|----------|---------|-----|-----|------------|----------------------------------------------|
| yellow | 1731 | 1430 | 4  | 5.16E-07 | 0.00883 | 23  | 82  | GO:0031279 | regulation of cyclase activity               |
| yellow | 1731 | 1430 | 5  | 6.93E-07 | 0.01187 | 27  | 108 | GO:0006171 | cAMP biosynthetic process                    |
| yellow | 1731 | 1430 | 6  | 8.75E-07 | 0.01498 | 69  | 425 | GO:0004930 | G-protein coupled receptor activity          |
| yellow | 1731 | 1430 | 7  | 1.64E-06 | 0.02804 | 26  | 106 | GO:0030817 | regulation of cAMP biosynthetic process      |
| yellow | 1731 | 1430 | 8  | 1.83E-06 | 0.03138 | 109 | 781 | GO:0007186 | G-protein coupled receptor signaling pathway |
| yellow | 1731 | 1430 | 9  | 2.07E-06 | 0.0354  | 112 | 810 | GO:0004888 | transmembrane signaling receptor activity    |
| yellow | 1731 | 1430 | 10 | 2.31E-06 | 0.03957 | 47  | 259 | GO:0034702 | ion channel complex                          |
